1 **Altered Bacteria-Fungi Inter-Kingdom Network in Gut of Ankylosing**  
2 **Spondylitis Patients**

3

4 Running Title: Altered Bacteria-Fungi Network in AS Patients

5

6 Ming Li,<sup>a</sup> Bingbing Dai,<sup>b</sup> Yawei Tang,<sup>a</sup> Lei Lei,<sup>b</sup> Ningning Li,<sup>b</sup> Chang Liu,<sup>b</sup> Teng Ge,<sup>c</sup>  
7 Lilong Zhang,<sup>a</sup> Yao Xu,<sup>a</sup> Yuqi Hu,<sup>a</sup> Pengfei Li,<sup>a</sup> Yan Zhang,<sup>d</sup> Jieli Yuan,<sup>a</sup> and Xia Li<sup>a</sup>

8

9 <sup>a</sup>College of Basic Medical Science, Dalian Medical University, Dalian, China;

10 <sup>b</sup>Department of Rheumatology and Immunology, Dalian Municipal Central Hospital  
11 Affiliated of Dalian Medical University, Dalian, China;

12 <sup>c</sup>Liaoning International Travel Health Care Center, Dalian, China;

13 <sup>d</sup>Department of Rheumatology and Immunology, The Second Affiliated Hospital of  
14 Dalian Medical University, Dalian, China.

15

16 Ming Li and Bingbing Dai contributed equally to this work.

17

18 Correspondence to:

19 Prof. Ming Li, Ph.D. Department of Microecology, College of Basic Medical Science,  
20 Dalian Medical University, No. 9 Western Section, Lvshun South Street, Lvshunkou  
21 District, 116044 Dalian, China. E-mail: [yivianmarat@163.com](mailto:yivianmarat@163.com)

22 Prof. Xia Li, Ph.D. Department of Immunology, College of Basic Medical Science,

23 Dalian Medical University, No. 9 Western Section, Lvshun South Street, Lvshunkou

24 District, 116044 Dalian, China. E-mail: [lixia416@163.com](mailto:lixia416@163.com)

25

26 **ABSTRACT** Intestinal bacterial dysbiosis has been increasingly linked to  
27 Ankylosing Spondylitis (AS), which is a prototypic and best studied subtype of  
28 Spondyloarthritis (SpA). Fungi and bacteria coexist in human gut and interact with  
29 each other, although they have been shown to contribute actively to health or diseases,  
30 no studies have investigated whether fungal microbiota in AS patients is perturbed. In  
31 this study, fecal samples of 22 AS patients, with clinical and radiographic assessments,  
32 and 16 healthy controls (HCs) were collected to systematically characterize the gut  
33 microbiota and mycobiota in AS patients by 16S rDNA and ITS2-based DNA  
34 sequencing. The relationships between therapeutic regimens, disease activity,  
35 radiographic damage of AS and gut micro/mycobiome were investigated. Our results  
36 showed a distinct mycobiota pattern in AS in addition to microbiota dysbiosis. The  
37 gut mycobiome of AS patients was characterized by higher taxonomic levels of  
38 *Ascomycota*, especially the class of *Dothideomycetes*, and decreased abundance of  
39 *Basidiomycota*, which was mainly contributed by the decrease of *Agaricales*.  
40 Compared to HCs, changing of the ITS2/16S biodiversity ratio, and bacteria-fungi  
41 inter-kingdom network were observed in AS patients. Alteration of gut mycobiota was  
42 associated with different therapeutic regimens, disease activity, as well as different  
43 degrees of radiographic damage. Moreover, we unraveled a disease-specific  
44 inter-kingdom network alteration in AS. Finally, we also identified some trends  
45 suggesting that different therapeutic regimens may induce changing of both bacterial  
46 and fungal microbiota in AS.

47

48 **IMPORTANCE** Human gut is colonized by diverse fungi (mycobiome), and they  
49 have long been suspected in the pathogenesis of Spondyloarthritis (SpA). Our study  
50 unraveled a disease-specific inter-kingdom network alteration in AS, suggesting that  
51 fungi, or the inter-kingdom interactions between bacteria and fungi, may play an  
52 essential role in AS development. However, limited by sample size and in-deep  
53 mechanism studies, further large scale investigations on the characterization of gut  
54 mycobiome in AS patients are needed to form a foundation for research into the  
55 relationship between mycobiota dysbiosis and AS development.

56

57 **KEYWORDS:** ankylosing spondylitis, mycobiota, microbiota, dysbiosis,  
58 inter-kingdom network

59

60 **INTRODUCTION**

61 Spondyloarthritis (SpA) is a group of several related but phenotypically distinct  
62 disorders: psoriatic arthritis (PsA), arthritis related to inflammatory bowel disease  
63 (IBD), reactive arthritis, a subgroup of juvenile idiopathic arthritis, and ankylosing  
64 spondylitis (AS) (1). The exact pathogenesis of SpA remains unknown (2); however,  
65 altered immune responses towards gut microbiota under the influence of genetic and  
66 environmental factors have been shown in autoimmune diseases related to SpA (3-6).

67 Among the related disorders, AS is the prototypic and best studied subtype of  
68 SpA. Up to 70% of AS patients have subclinical gut inflammation and 5-10% of these  
69 patients have more severe intestinal inflammation that progresses to clinically defined  
70 IBD (7). As intestinal dysbiosis has been increasingly linked to IBD in recent years  
71 (8-10), it is reasonable to speculate a close link between gut microbiota and AS  
72 development (3,11). Previous works have shown that the patients and transgenic rat  
73 model of AS had increased immunoglobulins G (IgG) or pro-inflammatory cytokines  
74 in response to bacterial products such as outer membrane protein and  
75 lipopolysaccharide (LPS) (12,13). A small case 16S ribosomal DNA sequencing  
76 analysis has shown dysbiosis in terminal ileum biopsy specimens of AS patients (14).  
77 A recent quantitative metagenomics study, based on deep shotgun sequencing using  
78 gut microbial DNA from 211 Chinese individuals, also proved that alterations of the  
79 gut microbiome were associated with development of AS (15). Alterations of gut  
80 microbial genera, such as *Bacteroides* (16), *Prevotella* (17), *Bifidobacterium* and  
81 *Lachnospiraceae* subgroups, *etc.* (18) in IBD were highly in accordance with the

82 patterns that were observed in AS patients.

83 Besides bacterial dysbiosis, a distinct alteration of fungal microbiota (mycobiota)  
84 was also identified in fecal samples of IBD patients (19). Although constituting only a  
85 small part of gut microbiome (20), mycobiota has been shown to contribute actively  
86 to health or diseases in a complex manner (21,22). Actually, fungi have long been  
87 suspected in SpA. For example, the anti-*Saccharomyces cerevisiae* antibodies (ASCA)  
88 were found to be associated with intestinal inflammation in SpA (23).  $\beta$ -1,3-glucan, a  
89 fungal product, had been shown to trigger SpA in BALB/c ZAP-70W163C–mutant  
90 (SKG) mice (24), and this response was mediated by interleukin-23 (IL-23)-provoked  
91 local mucosal dysregulation and cytokines driving SpA syndrome (25). Dectin-1, the  
92 C-type lectin-like pattern recognition receptor of  $\beta$ -1,3-glucan, and downstream gene  
93 Caspase recruitment domain-containing protein 9 (CARD9) are the common  
94 candidates for genetic studies in AS, PsA and Crohn's disease (26,27). However, to  
95 our knowledge, no studies have investigated whether fungal microbiota in AS patients  
96 is perturbed.

97 In this study, we characterized both microbial and fungal microbiota in fecal  
98 samples of AS patients using high through-out sequencing, and analyzed the  
99 correlation between bacterial and fungal microbiota. We also compared the gut  
100 microbiome of AS patients receiving different therapeutic regimens, or with different  
101 disease activities. Data in our study represent a first systematic analysis of  
102 microbiome in AS patients, and provide a rationale to support the role of mycobiota  
103 dysbiosis in AS pathogenesis.

104

105 **RESULTS**

106 **Participant characteristics.** We included a total of 71 individuals in the current  
107 analysis, composed of 30 healthy controls (HCs), 41 cases with AS (Supplementary  
108 Fig. S1). Of the AS cases, 19.51 % (n=8) were newly diagnosed as AS, 80.49 % (n =  
109 33) were patients that had different years of disease duration, and were treated by  
110 biological agents (BLs) or NSAIDs. Due to medical histories of other diseases, and/or  
111 use of antibiotics, probiotics, prebiotics or synbiotics before fecal samples collection,  
112 19 patients were excluded. The included 22 AS patients are all males with an average  
113 age of 34.86 years old. 14 HCs were excluded for age and gender matching, the  
114 remained HCs are all males with an average age of 34.35 (No age difference between  
115 AS and HC group,  $p>0.05$ ). As expected, the majority of these patients were detected  
116 as HLA-B27 positive (>85 %) and with axial involvement (>94 %). The disease  
117 activity parameters including CRP, ESR, and BASDAI were summarized in Table 1.  
118 The radiographic assessments showed that 22.73 %, 45.45 %, and 31.82 % of the  
119 patients have II, III, and IV levels of structural damage in their spine, respectively.  
120 During follow-up, 9 of the patients were at some time exposed to NSAIDs and 8 to  
121 BLs such as TNF inhibitors.

122 **Altered bacterial microbiota in AS patients.** We first analyzed the bacterial  
123 fraction of the microbiota using high-throughput sequencing of the bacterial 16S  
124 ribosomal RNA gene. Compared with HCs, the observed species and alpha diversity  
125 (assessed using Shannon and Simpson index) of gut microbiota in AS patients was  
126 relatively increased, while there were no statistical differences among all indexes (Fig.

127 1A, B, C, all  $p > 0.05$ ). The analysis based on weighted unifrac showed a statistically  
128 significant increase of beta diversity in AS group compared with HC group (Fig. 1D,  
129  $p = 0.0022$ ), although the NMDS analysis did not exhibit an obvious separation  
130 between AS samples and those of HC group (Fig. 1E).

131 The analysis of phylotypes indicated that *Bacteroidetes*, *Firmicutes*,  
132 *Proteobacteria*, *Fusobacteria*, and *Actinobacteria* were the dominant taxa in both the  
133 AS patients and healthy controls (Fig. 1F). At the phylum level, increased abundance  
134 of *Proteobacteria* ( $p = 0.0399$ ) and decreased *Bacteroidetes* ( $p = 0.0177$ ) were found in  
135 AS patients compared with HC group (Supplementary Fig. S2 and Table S1). We also  
136 observed a greater abundance of *Firmicutes*, *Actinobacteria*, and a lower abundance  
137 of *Fusobacteria*, which highly agree with the results of Wen *et al.* (15), although the  
138 t-test between groups showed insignificant (all  $p > 0.05$ ). Consistent with this result,  
139 enriched bacterial genera of *Escherichia-Shigella* (*Proteobacteria*), *Veillonella*  
140 (*Firmicutes*), *Faecalibacterium* (*Firmicutes*), *Eubacterium rectale* group (*Firmicutes*),  
141 *Streptococcus* (*Firmicutes*), *Lachnospiraceae* NK4A136 group (*Firmicutes*), and  
142 reduced pattern of *Prevotella* 9 (*Bacteroidetes*), *Megamonas* (*Firmicutes*),  
143 *Fusobacterium* (*Fusobacteria*) were detected (Fig. 1G).

144 A LefSe analysis was further adopted to identify the bacterial groups that showed  
145 significant differences in abundance between AS and HC. As shown in Fig. 1H, the  
146 comparison between AS and HC groups revealed that the major depleted bacterial  
147 group in AS patients is the phylum of *Bacteroidetes*, especially the class of  
148 *Bacterioidia* and order of *Bacteroidales*. In contrast, *Enterobacteriales* and



149 *Gammaproteobacteria* were significantly abundant in AS (Supplementary Fig. S3).

150 **Altered bacterial microbiota in AS patients receiving different therapeutic**

151 **regimens.** In our study, some of the fecal samples were from newly diagnosed AS

152 patients without any medical treatment, and they were defined as the treatment naïve

153 group (TN, n=6). The other patients were grouped by the therapeutic regimens

154 received, including biologics (BL, n=8) and NSAID (NS, n=9) (Details in Table 1).

155 Compared with healthy individuals, the species of gut bacteria in AS patients treated

156 with NSAID were obviously increased, but the statistic test did not show significant

157 difference between any of the two groups (Fig. 2A, all>0.05, Supplementary Table

158 S2). The Shannon and Simpson index suggested a significant elevation of alpha

159 diversity in treatment naïve patients (p=0.0412, p=0.0158, Supplementary Table S3)

160 compared with HC group. Among the AS patients, treatment of biologics resulted in

161 reduction of alpha diversity of gut bacteria in contrast to the TN group, especially

162 when tested by Simpson index (p=0.0497, Supplementary Table S4). The principal

163 coordinate analysis (PCoA) by both weighted and unweighted UniFrac showed that

164 there was no obvious separation of groups (Fig. 2B). The variations of gut microbes in

165 each group were also observed on phylum and genus levels (Fig. 2C, D). The

166 *Proteobacteria* (especially the family of *Enterobacteriaceae*) and the genus of

167 *Veillonella* were found enriched in AS patients treated with biologics when compared

168 with the patients without treatment (TN group), in which the species of

169 *Phascolarctobacterium faecium* was significantly more abundant (Fig. 2E). However,

170 no bio-markers were detected in others groups of AS patients by means of LefSe

171 analysis.

172 **Altered mycobiota in AS patients.** By sequencing of ITS2, we assessed the  
173 composition of fungal microbiota in our population. The results showed that, there  
174 were 354 OTUs unique to HC, 265 OTUs unique to AS, while 349 were shared  
175 between two groups (Fig. 3A). Different from the results found with the bacterial  
176 microbiota, the alpha diversity of intestinal fungi was significantly decreased in AS  
177 patients, as shown in Fig. 3B, the observed species and shannon index in AS group  
178 were significantly lower than in controls (All  $p < 0.05$ , Supplementary Table S5). To  
179 explore the equilibrium between bacteria and fungi diversity in the gut, we  
180 determined the fungi-to-bacteria species ratio. This ratio was significantly decreased  
181 in AS samples ( $p = 0.027$ , Fig. 3C). The PCoA showed that AS samples grouped  
182 separately from HC, indicating that changing of fungal communities might be one of  
183 the factors influencing the disease (Fig. 3D). A detailed comparison of relative  
184 abundance of fungi between HC and AS (Fig. 3E) showed that, the phyla of  
185 *Ascomycota* and *Basidiomycota* were dominated in both groups, and there was an  
186 obvious changing in proportion of these two phyla in AS patients. Among the most  
187 dominant genera, *Alternaria*, *Saccharomyces* and *Candida* were increased in AS  
188 patients, in contrast to decrease in other genera (Fig. 3F). The comparison between  
189 AS and HC by LefSe revealed that the higher taxonomic levels of *Ascomycota*,  
190 especially the class of *Dothideomycetes* in this phylum, were significantly more  
191 abundant in AS patients (Fig. 3G), except the family of *Xylariaceae* (which belong to  
192 *Ascomycota*), while the phylum of *Basidiomycota* was dominant in HC, that may

193 mainly contribute by the abundance of *Agaricales*.

194 **Altered mycobiota in AS patients receiving different therapeutic regimens.**

195 We further compared the gut mycobiota of AS patients grouped by different  
196 therapeutic regimens. Notably, a significantly reduced alpha diversity was observed in  
197 treatment naïve AS patients when compared with the healthy control, especially when  
198 evaluated by Shannon and Simpson index (Fig. 4A, all  $p < 0.05$ , Supplementary Table  
199 S6-8). Treatment with biologics resulted an even lower level of observed fungal  
200 species and alpha diversity compared with the untreated TN group. In contrast, the  
201 NSAID treatment did not induce a distinct change in the number of gut fungal species  
202 in AS patients. However, when evaluated by the fungi-to-bacteria diversity ratio, we  
203 observed a significant decreased pattern in AS patients treated with both NSAID (Fig.  
204 4B,  $p = 0.027$ ) and biologics ( $p = 0.046$ ), compared with that of the HC group. The  
205 PCoA by both weighted and unweighted Unifrac showed that the gut mycobiota of  
206 BL group separately clearly from HC, NS, and TN groups, indicating that the  
207 treatment of biologics has a profound influence on the fungal communities in AS  
208 patients (Fig. 4C). The LefSe analysis revealed that the most dominant fungal  
209 microbiota differs significantly among the four groups (Fig. 4D). Notably, the fungal  
210 microbiota in treatment naïve AS patients is characterized by the dominant of  
211 *Dothideomycetes* class, which is consist with the results of Fig. 3. In BL group, the  
212 most dominant fungal microbiota was *Saccharomyces*, this genus contributed  
213 significantly to the abundance of *Ascomycota* in AS patients of BL group.

214 **AS patients showed altered bacteria - fungi associations.** In addition to

215 composition differences, we found that the bacterial and fungal microbiota network at  
216 genus level in AS patients was notably different from that in healthy controls  
217 (Supplementary Fig. S4). Specifically, the density of bacterial network in AS patients  
218 was remarkable higher than that of the healthy individuals, while reduced network  
219 centralization and density of fungal communities were detected in these patients,  
220 which suggested an alteration of entire ecosystem in gut of AS patients. To test this  
221 hypothesis, we further investigated the bacteria - fungi correlation at the genus level  
222 according to disease phenotype. A higher spearman correlation in AS compared with  
223 HC was found (Fig. 4E). Interestingly, in AS patients, we observed a positive  
224 correlation between the abundance of *Saccharomyces* and *Clostridium sensu stricto*,  
225 *Escherichia/Shigella*, *Veillonella*, while a negative correlation between the abundance  
226 of *Saccharomyces* and *Roseburia* and *Faecalibacterium*. A positive correlation  
227 between the abundance of *Candida* and *Roseburia*, *Faecalibacterium* and  
228 *Ruminococcus* was also detected in AS patients, which differed from that of the HC  
229 group. Strikingly, among the AS patients, treatment of biologics and NSAID induced  
230 extensive changes in bacteria - fungi associations when compared with the untreated  
231 AS patients. Notably, many positive correlations connecting genera from *Aspergillus*  
232 to *Ruminococcus*, *Blautia*, *Parabacteroides* and *Faecalibacterium* were observed in  
233 AS patients with NSAID treatment. And there was more positive correlation between  
234 the abundance of *Penicillium* and *Clostridium XIVa*, *Roseburia*, *Lachnospiracea*  
235 *incertea sedis* and *Gemmiger* in AS patients with biologics treatment. Additionally,  
236 *Saccharomyces* followed a complicated opposite correlation with several bacterial

237 genera in BL group. Taken together, these results suggest a complex relationship  
238 between the bacteria and fungi in the gut microbiota, and that specific alterations are  
239 present in patients receiving different therapeutic regimens.

240 **Altered mycobiota in AS patients was associated with disease activities and**  
241 **degree of radiographic damage.** The canonical correspondence analysis (CCA) was  
242 used to establish the relationship between AS disease activity indexes (including  
243 BASDAI, CRP, and ESR) and the bacterial and fungal genera. As shown in Fig. 5A,  
244 the BASDAI and CRP levels were found strongly correlated to the fungal genera in  
245 treatment naïve AS patients (TN), whereas no obvious correlations were detected  
246 between bacteria genera and the disease activity indexes. We further analyzed the gut  
247 bacterial and fungal compositions of AS patients at genus level according to their  
248 stages of radiographic changes by principal component analysis (PCA, Fig. 5B).  
249 Intriguingly, a strongly separated pattern of gut mycobiota was observed in AS  
250 patients with Grade III and Grade IV stages, when compared with the healthy controls  
251 and the Grade II stage of AS patients. The elevated relative abundance of genera, such  
252 as *Saccharomyces* and *Lodderomyces*, in AS patients at Grade IV stage may  
253 contribute to the alteration of fungal community patterns (Supplementary Fig. S5).

## 254 **DISCUSSION**

255 In this study, we explored a distinct mycobiota pattern and altered bacteria-fungi  
256 interactions in gut of AS patients, which represents a novel research viewpoint of the  
257 gut microbiome dysbiosis in AS.

258 Our finding provided a further confirmation of the alterations in gut microbial

259 groups that might be associated with the development of AS. At the phylum level,  
260 increased abundance of *Proteobacteria* and decreased *Bacteroidetes* were found in AS  
261 patients, which was proved by previous study in the terminal ileum biopsy specimens  
262 of AS patients (14). In addition, there was a greater abundance of *Firmicutes*,  
263 *Actinobacteria* and a lower abundance of *Fusobacteria* detected in gut of AS patients,  
264 which highly agreed with the results of Wen *et al.*(15). Notably, the decrease of  
265 *Bacteroidales* in AS patients was mainly contributed by the depletion of *Prevotella*  
266 spp. This result apparently disagreed with Wen *et al.*'s study, in which an increase in  
267 the abundance of *Prevotella* spp. was observed in AS patients, although Costello *et*  
268 *al.*'s study supported that the family of *Prevotellaceae* in AS was decreased.  
269 *Prevotella* spp. was found with inflammatory properties, as demonstrated by  
270 augmented release of inflammatory mediators from immune cells and various stromal  
271 cells (28), which suggested that some *Prevotella* strains might be clinically important  
272 pathobionts and could participate in human diseases by promoting chronic  
273 inflammation. However, in our viewpoint, a depletion of immune-stimulating bacteria  
274 in gut may be closely associated with immunodeficiency in human, as supported that  
275 *Prevotella* abundance was reduced within the lung microbiota in patients with asthma  
276 and chronic obstructive pulmonary disease (29).

277 Prompted by recent studies in IBD patients (20,31), we profiled the fungal  
278 microbiome of the AS patients by sequencing analysis of the ITS2 marker gene,  
279 which provided greater resolution of the mycobiome membership compared to  
280 metagenomic and 18S rRNA gene sequencing data (20). Interestingly, a more

281 pronounced fungal dysbiosis than bacterial dysbiosis in AS patients was detected in  
282 this study. We observed a significant decrease in the diversity of intestinal fungi in  
283 these patients. What's more, the abundance of *Ascomycota* and *Basidiomycota* were  
284 strongly negatively correlated with each other and were among the most important  
285 discriminative features between AS and HC mycobiota. These results highly agreed  
286 with findings in IBD patients, in which the *Basidiomycota*-to-*Ascomycota* abundance  
287 ratio differed between patients with IBD and HC (19), suggesting that this imbalance  
288 may be either driven by inflammation or involved in the inflammatory process.

289 Fungi and bacteria coexist in human and animal gut and interact with each other  
290 (32-34). Expansion or reduction of fungi can be observed in mice post antibiotics  
291 treatment or following antibiotic cessation (35), suggesting a balance between fungal  
292 and bacterial microbiota. Our observation of the alterations in the fungi-bacteria  
293 diversity balance in AS suggested a modified inter-kingdom interaction. In addition to  
294 differences in the ITS2/16S biodiversity ratio, we noted a disease-specific pattern for  
295 the inter-kingdom network by the spearman correlation analysis. In AS, especially the  
296 treatment naïve patients, the number and the intensity of the correlations between  
297 fungi and bacteria were increased. The altered biodiversity in bacteria and fungi is  
298 associated with new inter-kingdom interactions that may be involved in the  
299 inflammatory process (19). Notably, this interaction in AS patients receiving NB or  
300 BL differed significantly from that of the HC and TN groups. Especially in patients  
301 treated with BL, the stronger correlations between fungi and bacteria suggested a  
302 profound effect of immunosuppressive regimens. Given the limited number of study

303 cases, further large scale studies on the characterization of gut microbiome and  
304 mycobiome in AS patients with different therapeutic regimens are necessary.

305 CRP is well established as biomarker that directly reflect inflammation as acute  
306 phase reactants in AS (36). AS patients showed significant correlation between CRP  
307 with clinical parameters such as pain, morning stiffness, enthesitis-related local  
308 discomfort, BASDAI, BASFI (Bath Ankylosing Spondylitis Functional Index) and  
309 BASMI (Bath Ankylosing Spondylitis Metrology Index). In our study, we found a  
310 strong positive correlation between serum CRP levels and fungal microbiota in the  
311 new cases of AS (TN group), and this pattern was confirmed by the CCA of BASDAI.  
312 In contrast, treatment of BL or NS have profound effects on changing of specific gut  
313 microbial and fungal groups, which may associate with altered disease activities in  
314 AS patients. In addition, it was confirmed that disease activity contributes  
315 longitudinally to radiographic progression in the spine of AS patients (37). The  
316 structural damage in the spine was found to be associated with the acute phase  
317 reactants (APR) CRP and ESR (38-41). We therefore analyzed the gut microbial and  
318 fungal microbiota structures according to the radiographs that was scored according to  
319 the New York criteria. Interestingly, the gut fungal microbiota of AS patients  
320 clustered clearly into three groups, and it was highly correlated with the radiographic  
321 assessment. The patients with level III and IV damage in their spines had  
322 distinguished fungal microbiota structure when compared with level II or healthy  
323 controls, while no significant clustering was observed between the latter two groups.  
324 These results suggested an important role of mycobiome in the development of AS.



325           **Conclusion.** In conclusion, our study identified a distinct mycobiota dysbiosis  
326 in AS in addition to the alterations in bacterial microbiota. Moreover, we unraveled  
327 disease-specific inter-kingdom network alterations in AS, suggesting that fungi, or the  
328 inter-kingdom interactions between bacteria and fungi, may play a more essential role  
329 in AS development. Finally, although our study was not statistically sufficient, we  
330 identified some trends suggesting that different therapeutic regimens may induce  
331 changing of both bacterial and fungal microbiota in AS.

## 332 **MATERIALS AND METHODS**

333 **Study subjects and sample collection.** The recruitment of participants and the  
334 process of sample collection were depicted in figure S1. Forty one patients (aged 15  
335 – 58 years) were ultimately recruited from Dalian Municipal Central Hospital and the  
336 Second Affiliated Hospital of Dalian Medical University, Dalian, China, from May to  
337 September 2017. The disease activity measures of AS patients included the Bath AS  
338 Disease Activity Index (BASDAI), AS Disease Activity Index (ASDAS)-C-reactive  
339 protein (CRP), CRP, erythrocyte sedimentation rate (ESR), patient's global  
340 assessment and spinal pain (37). And two readers independently scored the  
341 radiographs according to the New York criteria, which describes 5 grades of  
342 sacroiliitis ranging from 0 to 4 (42).

343           The fecal samples were collected in Stool Collection Tubes, which were  
344 pre-filled with Stool DNA Stabilizer for collection (Stratec, Germany), then frozen  
345 and stored at -80 °C for further use. All subjects were examined clinically before  
346 sampling and were subsequently divided into four groups according to different

347 pharmacological therapies: treatment naïve (TN, n=8), patients receiving  
348 non-steroidal anti-inflammatory drug (NSAID, n=18) and patients receiving biologics  
349 (BL, n=15). The samples of the healthy controls (HC, n=30) were collected during  
350 routine physical examination at the Liaoning International Travel Health Care Center,  
351 Dalian, China.

352 The participants with the following diseases were excluded: cardiovascular  
353 disease, diabetes mellitus, liver cirrhosis, infections with known active bacteria, fungi,  
354 or virus. Those who abused drug or alcohol in the last year, or used antibiotics,  
355 probiotics, prebiotics or synbiotics in the month before collection of the fecal samples  
356 were also excluded.

357 **DNA isolation and library construction.** The metagenomic DNA in the fecal  
358 samples was extracted by the QIAamp DNA stool mini kit (Qiagen, Germany). The  
359 purity and concentration of the metagenomic DNA were measured by NanoDrop 2000  
360 spectrophotometer (Thermo, USA).

361 The V3-V4 region of 16S rDNA (representing bacteria) and the internal  
362 transcribed spacer regions 2 (ITS2, representing fungi)<sup>20</sup> were amplified with the  
363 primers (16S: F341 and R806, PCR product: 425 bp; ITS2: ITS3 and ITS4, PCR  
364 product: 320 bp). Primer sets were modified with Illumina adapter regions for  
365 sequencing on the Illumina GAIIx platform, and reverse primers were modified with  
366 an 8-bp Hamming error-correcting barcode to distinguish among samples. The DNA  
367 template (100 ng) was combined with 5 µL PCR buffer, 1 µL dNTPs, 0.25 µL  
368 HotStarTaq® Plus DNA Polymerase (Qiagen), and 2.5 pmol of each primer in 50 µL

369 total volume. Reactions consisted of an initial step at 95 °C for 5 min; 25 (16S rDNA)  
370 or 38 (ITS2 rDNA) cycles of 94 °C for 45 s, 55 °C for 45 s and 72 °C for 60 s; and a  
371 final extension at 72 °C for 10 min. DNA products were checked by 1.5% (w/v)  
372 agarose gel electrophoresis in 0.5 mg/mL ethidium bromide and purified with the  
373 Qiaquick gel extraction kit (Qiagen).

374 **Bioinformatics analysis.** Sequences of the V3-V4 region of 16S rDNA and ITS2  
375 were detected using an Illumina HiSeq PE250 platform (reconstructed cDNA  
376 sequence: 2 × 250 bp, Novogene Bioinformatics Technology Co. Ltd, Beijing).  
377 Ribosomal Database Project (RDP) Classifier 2.8 was used for taxonomical  
378 assignment of all sequences at 50% confidence after the raw sequences were  
379 identified by their unique barcodes. OTUs present in 50% or more of the fecal  
380 samples were identified as core OTUs. PLS-DA of core OTUs was performed using  
381 Simca-P version 12 (Umetrics), and a heat map was generated with Multi-Experiment  
382 Viewer (MeV) software to visualize and cluster the fungal community into different  
383 groups. Community diversity was measured by the Shannon-Weiner biodiversity  
384 index (Shannon index).

385 **Statistical analysis.** All data were evaluated as mean ± SEM. Statistical analysis  
386 of the quantitative multiple group comparisons was performed using one-way analysis  
387 of variance (and non-parametric), followed by wilcox's test; when two groups were  
388 compared, the non-parametric *t*-test was performed with the assistance of GraphPad  
389 Prism 6 (Graph Pad Software, La Jolla, CA, USA). Results were considered to be  
390 statistically significant with  $p < 0.05$ . \*  $p < 0.05$ ; \*\* $p < 0.01$ ; \*\*\*  $p < 0.001$ .

391           **Ethics statement.** This study protocol was approved by the Ethics Committees  
392 of all participating hospitals including Dalian Municipal Central Hospital and the  
393 Second Affiliated Hospital of Dalian Medical University, Dalian, China. All the  
394 procedures were performed in accordance with the guidelines approved by the Ethics  
395 Committee of Dalian Medical University, China. After receiving a written description  
396 of the aim of this study, all participants gave written informed consent prior to  
397 enrollment.

398

#### 399 **ACKNOWLEDGMENTS**

400 This research was funded by the National Natural Science Foundation of China (No.  
401 81671606), the program of Liaoning Distinguished Professor (Liao taught 2018-2020),  
402 the China Postdoctoral Science Foundation (2016M601317, 2018T110225), and the  
403 Research Foundation from the Department of Education, Liaoning Province, China  
404 (L2016003). This work was supported by Liaoning Provincial Program for Top  
405 Discipline of Basic Medical Sciences.

406

#### 407 **CONFLICT OF INTEREST**

408 The authors have no conflicts of interest associated with this manuscript.

409

410 **REFERENCES**

- 411 1 Bowes J, Ashcroft J, Dand N, Jalali-Najafabadi F, Bellou E, Ho P, Marzo-Ortega  
412 H, Helliwell PS, Feletar M, Ryan AW, Kane DJ, Korendowych E, Simpson MA,  
413 Packham J, McManus R, Brown MA, Smith CH, Barker JN, McHugh N,  
414 FitzGerald O, Warren RB, Barton A. 2017. Cross-phenotype association mapping  
415 of the MHC identifies genetic variants that differentiate psoriatic arthritis from  
416 psoriasis. *Ann Rheum Dis* 76: 1774-1779.
- 417 2 Winchester R, Minevich G, Steshenko V, Kirby B, Kane D, Greenberg DA,  
418 FitzGerald O. 2012. HLA associations reveal genetic heterogeneity in psoriatic  
419 arthritis and in the psoriasis phenotype. *Arthritis Rheum* 64: 1134-1144.
- 420 3 Scher JU, Ubeda C, Artacho A, Attur M, Isaac S, Reddy SM, Marmon S,  
421 Neimann A, Brusca S, Patel T, Manasson J, Pamer EG, Littman DR, Abramson  
422 SB. 2015. Decreased bacterial diversity characterizes the altered gut microbiota  
423 in patients with psoriatic arthritis, resembling dysbiosis in inflammatory bowel  
424 disease. *Arthritis Rheumatol* 67: 128-139.
- 425 4 Cua DJ, Sherlock JP. 2011. Autoimmunity's collateral damage: Gut microbiota  
426 strikes 'back'. *Nat Med* 17: 1055-1056.
- 427 5 Rath HC, Herfarth HH, Ikeda JS, Grenther WB, Hamm TE Jr, Balish E, Taurog  
428 JD, Hammer RE, Wilson KH, Sartor RB. 1996. Normal luminal bacteria,  
429 especially *Bacteroides* species, mediate chronic colitis, gastritis, and arthritis in  
430 HLA-B27/human beta2 microglobulin transgenic rats. *J Clin Invest* 98: 945-953.
- 431 6 Zhang X, Zhang D, Jia H, Feng Q, Wang D, Liang D, Wu X, Li J, Tang L, Li Y,

- 432 Lan Z, Chen B, Li Y, Zhong H, Xie H, Jie Z, Chen W, Tang S, Xu X, Wang X,  
433 Cai X, Liu S, Xia Y, Li J, Qiao X, Al-Aama JY, Chen H, Wang L, Wu QJ, Zhang  
434 F, Zheng W, Li Y, Zhang M, Luo G, Xue W, Xiao L, Li J, Chen W, Xu X, Yin Y,  
435 Yang H, Wang J, Kristiansen K, Liu L, Li T, Huang Q, Li Y, Wang J. 2015. The  
436 oral and gut microbiomes are perturbed in rheumatoid arthritis and partly  
437 normalized after treatment. *Nat Med* 21: 895-905.
- 438 7 Mielants H, Veys EM, Cuvelier C, De Vos M, Botelberghe L. 1985. HLA-B27  
439 related arthritis and bowel inflammation. Part 2. Ileocolonoscopy and bowel  
440 histology in patients with HLA-B27 related arthritis. *J Rheumatol* 12: 294-298.
- 441 8 Machiels K, Joossens M, Sabino J, De Preter V, Arijs I, Eeckhaut V, Ballet V,  
442 Claes K, Van Immerseel F, Verbeke K, Ferrante M, Verhaegen J, Rutgeerts P,  
443 Vermeire S. 2014. A decrease of the butyrate-producing species *Roseburia*  
444 *hominis* and *Faecalibacterium prausnitzii* defines dysbiosis in patients with  
445 ulcerative colitis. *Gut* 63: 1275-1283.
- 446 9 Gevers D, Kugathasan S, Denson LA, Vázquez-Baeza Y, Van Treuren W, Ren B,  
447 Schwager E, Knights D, Song SJ, Yassour M, Morgan XC, Kostic AD, Luo C,  
448 González A, McDonald D, Haberman Y, Walters T, Baker S, Rosh J, Stephens M,  
449 Heyman M, Markowitz J, Baldassano R, Griffiths A, Sylvester F, Mack D, Kim S,  
450 Crandall W, Hyams J, Huttenhower C, Knight R, Xavier RJ. 2014. The  
451 treatment-naive microbiome in new-onset Crohn's disease. *Cell Host Microbe* 15:  
452 382-392.
- 453 10 Jostins L, Ripke S, Weersma RK, Duerr RH, McGovern DP, Hui KY, Lee JC,

- 454 Schumm LP, Sharma Y, Anderson CA, Essers J, Mitrovic M, Ning K, Cleynen I,  
455 Theatre E, Spain SL, Raychaudhuri S, Goyette P, Wei Z, Abraham C, Achkar JP,  
456 Ahmad T, Amininejad L, Ananthakrishnan AN, Andersen V, Andrews JM,  
457 Baidoo L, Balschun T, Bampton PA, Bitton A, Boucher G, Brand S, Büning C,  
458 Cohain A, Cichon S, D'Amato M, De Jong D, Devaney KL, Dubinsky M,  
459 Edwards C, Ellinghaus D, Ferguson LR, Franchimont D, Fransen K, Gearry R,  
460 Georges M, Gieger C, Glas J, Haritunians T, Hart A, Hawkey C, Hedl M, Hu X,  
461 Karlsen TH, Kupcinskis L, Kugathasan S, Latiano A, Laukens D, Lawrance IC,  
462 Lees CW, Louis E, Mahy G, Mansfield J, Morgan AR, Mowat C, Newman W,  
463 Palmieri O, Ponsioen CY, Potocnik U, Prescott NJ, Regueiro M, Rotter JJ,  
464 Russell RK, Sanderson JD, Sans M, Satsangi J, Schreiber S, Simms LA,  
465 Sventoraityte J, Targan SR, Taylor KD, Tremelling M, Verspaget HW, De Vos M,  
466 Wijmenga C, Wilson DC, Winkelmann J, Xavier RJ, Zeissig S, Zhang B, Zhang  
467 CK, Zhao H; International IBD Genetics Consortium (IIBDGC), Silverberg MS,  
468 Annese V, Hakonarson H, Brant SR, Radford-Smith G, Mathew CG, Rioux JD,  
469 Schadt EE, Daly MJ, Franke A, Parkes M, Vermeire S, Barrett JC, Cho JH. 2012.  
470 Host-microbe interactions have shaped the genetic architecture of inflammatory  
471 bowel disease. *Nature* 491: 119-124.
- 472 11 Laurence M, Asquith M, Rosenbaum JT. 2018. Spondyloarthritis, acute anterior  
473 uveitis, and fungi: updating the catterall-king hypothesis. *Front Med (Lausanne)* 5:  
474 80.
- 475 12 Madhavan R, Porkodi R, Rajendran CP, Chandrasekaran AN, Umadevi KR,

- 476 Alamelu R. 2002. IgM, IgG, and IgA response to enterobacteria in patients with  
477 ankylosing spondylitis in southern India. *Ann N Y Acad Sci* 958: 408-411.
- 478 13 Zeng L, Lindstrom MJ, Smith JA. 2011. Ankylosing spondylitis macrophage  
479 production of higher levels of interleukin-23 in response to lipopolysaccharide  
480 without induction of a significant unfolded protein response. *Arthritis Rheum* 63:  
481 3807-3817.
- 482 14 Costello ME, Ciccio F, Willner D, Warrington N, Robinson PC, Gardiner B,  
483 Marshall M, Kenna TJ, Triolo G, Brown MA. 2015. Brief Report: Intestinal  
484 dysbiosis in ankylosing spondylitis. *Arthritis Rheumatol* 67: 686-691.
- 485 15 Wen C, Zheng Z, Shao T, Liu L, Xie Z, Le Chatelier E, He Z, Zhong W, Fan Y,  
486 Zhang L, Li H, Wu C, Hu C, Xu Q, Zhou J, Cai S, Wang D, Huang Y, Breban M,  
487 Qin N, Ehrlich SD. 2017. Quantitative metagenomics reveals unique gut  
488 microbiome biomarkers in ankylosing spondylitis. *Genome Biol* 18: 142.
- 489 16 Zhou Y, Zhi F. 2016. Lower level of *Bacteroides* in the gut microbiota is  
490 associated with inflammatory bowel disease: a meta-analysis. *Biomed Res Int*  
491 2016: 5828959.
- 492 17 Nakagome S, Chinen H, Iraha A, Hokama A, Takeyama Y, Sakisaka S, Matsui T,  
493 Kidd JR, Kidd KK, Said HS, Suda W, Morita H, Hattori M, Hanihara T, Kimura  
494 R, Ishida H, Fujita J, Kinjo F, Mano S, Oota H. 2017. Confounding effects of  
495 microbiome on the susceptibility of TNFSF15 to Crohn's disease in the Ryukyu  
496 Islands. *Hum Genet* 136: 387-397.
- 497 18 Mancabelli L, Milani C, Lugli GA, Turrone F, Cocconi D, van Sinderen D,



- 498 Ventura M. 2017. Identification of universal gut microbial biomarkers of  
499 common human intestinal diseases by meta-analysis. *FEMS Microbiol Ecol*  
500 93(12).
- 501 19 Sokol H, Leducq V, Aschard H, Pham HP, Jegou S, Landman C, Cohen D,  
502 Liguori G, Bourrier A, Nion-Larmurier I, Cosnes J, Seksik P, Langella P, Skurnik  
503 D, Richard ML, Beaugerie L. 2017. Fungal microbiota dysbiosis in IBD. *Gut* 66:  
504 1039-1048.
- 505 20 Nash AK, Auchtung TA, Wong MC, Smith DP, Gesell JR, Ross MC, Stewart CJ,  
506 Metcalf GA, Muzny DM, Gibbs RA, Ajami NJ, Petrosino JF. 2017. The gut  
507 mycobiome of the Human Microbiome Project healthy cohort. *Microbiome* 5:  
508 153.
- 509 21 Wheeler ML, Limon JJ, Bar AS, Leal CA, Gargus M, Tang J, Brown J, Funari  
510 VA, Wang HL, Crother TR, Arditi M, Underhill DM, Iliev ID. 2016.  
511 Immunological consequences of intestinal fungal dysbiosis. *Cell Host Microbe* 19:  
512 865-873.
- 513 22 Wang ZK, Yang YS, Stefka AT, Sun G, Peng LH. 2014. Review article: fungal  
514 microbiota and digestive diseases. *Aliment Pharmacol Ther* 39: 751-766.
- 515 23 Rodrigues IK, Andrigueti M, de Oliveira Gil ID, de Lucca Schiavon L, de  
516 Andrade KR, Pereira IA, de Castro GR, Zimmermann AF, Saporiti LN, Bazzo  
517 ML, Neves FS. 2015. An investigation into the relationship between  
518 anti-*Helicobacter pylori* and anti-*Saccharomyces cerevisiae* antibodies in patients  
519 with axial spondyloarthritis and Crohn disease. *Rheumatol Int* 35: 359-366.

- 520 24 Ruutu M, Thomas G, Steck R, Degli-Esposti MA, Zinkernagel MS, Alexander K,  
521 Velasco J, Strutton G, Tran A, Benham H, Rehaume L, Wilson RJ, Kikly K,  
522 Davies J, Pettit AR, Brown MA, McGuckin MA, Thomas R. 2012.  $\beta$ -glucan  
523 triggers spondylarthritis and Crohn's disease-like ileitis in SKG mice. *Arthritis*  
524 *Rheum* 64: 2211-2222.
- 525 25 Benham H, Rehaume LM, Hasnain SZ, Velasco J, Baillet AC, Ruutu M, Kikly K,  
526 Wang R, Tseng HW, Thomas GP, Brown MA, Strutton G, McGuckin MA,  
527 Thomas R. 2014. Interleukin-23 mediates the intestinal response to microbial  
528 beta-1,3-glucan and the development of spondyloarthritis pathology in SKG mice.  
529 *Arthritis Rheumatol* 66: 1755-1767.
- 530 26 Ma X, Liu Y, Zhang H, Qiu R, Zhao H, Xin Q, Shan S, Dang J, Li J, Yang Z,  
531 Gong Y, Liu Q. 2014. Evidence for genetic association of CARD9 and SNAPC4  
532 with ankylosing spondylitis in a Chinese Han population. *J Rheumatol* 41:  
533 318-324.
- 534 27 Evans DM, Spencer CC, Pointon JJ, Su Z, Harvey D, Kochan G, Oppermann U,  
535 Dilthey A, Pirinen M, Stone MA, Appleton L, Moutsianas L, Leslie S,  
536 Wordsworth T, Kenna TJ, Karaderi T, Thomas GP, Ward MM, Weisman MH,  
537 Farrar C, Bradbury LA, Danoy P, Inman RD, Maksymowych W, Gladman D,  
538 Rahman P; Spondyloarthritis Research Consortium of Canada (SPARCC),  
539 Morgan A, Marzo-Ortega H, Bowness P, Gaffney K, Gaston JS, Smith M,  
540 Bruges-Armas J, Couto AR, Sorrentino R, Paladini F, Ferreira MA, Xu H, Liu Y,  
541 Jiang L, Lopez-Larrea C, Díaz-Peña R, López-Vázquez A, Zayats T, Band G,

542 Bellenguez C, Blackburn H, Blackwell JM, Bramon E, Bumpstead SJ, Casas JP,  
543 Corvin A, Craddock N, Deloukas P, Dronov S, Duncanson A, Edkins S, Freeman  
544 C, Gillman M, Gray E, Gwilliam R, Hammond N, Hunt SE, Jankowski J,  
545 Jayakumar A, Langford C, Liddle J, Markus HS, Mathew CG, McCann OT,  
546 McCarthy MI, Palmer CN, Peltonen L, Plomin R, Potter SC, Rautanen A,  
547 Ravindrarajah R, Ricketts M, Samani N, Sawcer SJ, Strange A, Trembath RC,  
548 Viswanathan AC, Waller M, Weston P, Whittaker P, Widaa S, Wood NW,  
549 McVean G, Reville JD, Wordsworth BP, Brown MA, Donnelly P;  
550 Australo-Anglo-American Spondyloarthritis Consortium (TASC); Wellcome  
551 Trust Case Control Consortium 2 (WTCCC2). 2011. Interaction between ERAP1  
552 and HLA-B27 in ankylosing spondylitis implicates peptide handling in the  
553 mechanism for HLA-B27 in disease susceptibility. *Nat Genet* 43: 761-767.

554 28 Larsen, J.M. 2017. The immune response to *Prevotella* bacteria in chronic  
555 inflammatory disease. *Immunology* 151: 363-374.

556 29 Hilty M, Burke C, Pedro H, Cardenas P, Bush A, Bossley C, Davies J, Ervine A,  
557 Poulter L, Pachter L, Moffatt MF, Cookson WO. 2010. Disordered microbial  
558 communities in asthmatic airways. *PLoS One* 5: e8578.

559 30 Zuo T, Kamm MA, Colombel JF, Ng SC. 2018. Urbanization and the gut  
560 microbiota in health and inflammatory bowel disease. *Nat Rev Gastroenterol*  
561 *Hepatol* 15: 440-452.

562 31 Chu Y, Jiang MZ, Xu B, Wang WJ, Chen D, Li XW, Zhang YJ, Liang J. 2018.  
563 Specific changes of enteric mycobiota and virome in inflammatory bowel disease.

- 564 J Dig Dis 19: 2-7.
- 565 32 Schei K, Avershina E, Øien T, Rudi K, Follestad T, Salamati S, Ødegård RA.  
566 2017. Early gut mycobiota and mother-offspring transfer. *Microbiome* 5: 107.
- 567 33 Iliev ID, Funari VA, Taylor KD, Nguyen Q, Reyes CN, Strom SP, Brown J,  
568 Becker CA, Fleshner PR, Dubinsky M, Rotter JI, Wang HL, McGovern DP,  
569 Brown GD, Underhill DM. 2012. Interactions between commensal fungi and the  
570 C-Type lectin receptor dectin-1 influence colitis. *Science* 336: 1314-1317.
- 571 34 Underhill DM, Lliev LD. 2014. The mycobiota: interactions between commensal  
572 fungi and the host immune system. *Nat Rev Immunol* 14: 405-416.
- 573 35 Dollive S, Chen YY, Grunberg S, Bittinger K, Hoffmann C, Vandivier L, Cuff C,  
574 Lewis JD, Wu GD, Bushman FD. 2013. Fungi of the murine gut: episodic  
575 variation and proliferation during antibiotic treatment. *PLoS One* 8: e71806.
- 576 36 Danve A, O'Dell J. 2015. The ongoing quest for biomarkers in Ankylosing  
577 Spondylitis. *Int J Rheum Dis* 18: 826-834.
- 578 37 Ramiro S, van der Heijde D, van Tubergen A, Stolwijk C, Dougados M, van den  
579 Bosch F, Landewé R. 2014. Higher disease activity leads to more structural  
580 damage in the spine in ankylosing spondylitis: 12-year longitudinal data from the  
581 OASIS cohort. *Ann Rheum Dis* 73: 1455-1461.
- 582 38 Poddubnyy D, Haibel H, Listing J, Märker-Hermann E, Zeidler H, Braun J,  
583 Sieper J, Rudwaleit M. 2012. Baseline radiographic damage, elevated acute-phase  
584 reactant levels, and cigarette smoking status predict spinal radiographic  
585 progression in early axial spondylarthritis. *Arthritis Rheum* 64: 1388-1398.

- 586 39 van Tubergen A, Ramiro S, van der Heijde D, Dougados M, Mielants H, Landew  
587 é R. 2012. Development of new syndesmophytes and bridges in ankylosing  
588 spondylitis and their predictors: a longitudinal study. *Ann Rheum Dis* 71:  
589 518-523.
- 590 40 Kroon F, Landewe R, Dougados M, van der Heijde D. 2012. Continuous NSAID  
591 use reverts the effects of inflammation on radiographic progression in patients  
592 with ankylosing spondylitis. *Ann Rheum Dis* 71: 1623-1629.
- 593 41 Haroon N, Inman RD, Learch TJ, Weisman MH, Lee M, Rahbar MH, Ward MM,  
594 Reveille JD, Gensler LS. 2013. Impact of tumor necrosis factor alpha inhibitors  
595 on radiographic progression in ankylosing spondylitis. *Arthritis Rheum* 65:  
596 2645-2654.
- 597 42 Wanders AJ, Landewé RB, Spoorenberg A, Dougados M, van der Linden S,  
598 Mielants H, van der Tempel H, van der Heijde DM. 2004. What is the most  
599 appropriate radiologic scoring method for ankylosing spondylitis? A comparison  
600 of the available methods based on the Outcome Measures in Rheumatology  
601 Clinical Trials filter. *Arthritis Rheum* 50: 2622-2632.

602 TABLES

603 TABLE 1. *Baseline demographic, clinical and radiographic*  
604 *characteristics of the AS patients*

605

| <b>Characteristic</b>                        | <b>AS patients (n=22)</b> |
|----------------------------------------------|---------------------------|
| <b>Age, years, mean (range)</b>              | 34.86 (15-58)             |
| <b>Male, %</b>                               | 100                       |
| <b>Disease duration, years, mean (range)</b> | 9.60 (0.17-40)            |
| <b>HLA-B27 positive, %</b>                   | 85.71                     |
| <b>Disease activity parameter</b>            |                           |
| CRP, mg/dl, mean (range)                     | 14.52 (0.1-67)            |
| ESR, mm/h, mean (range)                      | 27.53 (2-67)              |
| Axial involvement, %                         | 94.44                     |
| BASDAI, mean (range)                         | 5.05 (2.1-9.4)            |
| <b>Imaging classification</b>                |                           |
| I, %                                         | 0                         |
| II, %                                        | 22.73                     |
| III, %                                       | 45.45                     |
| IV, %                                        | 31.82                     |
| <b>Medication use</b>                        |                           |
| NSAIDs, %                                    | 40.91                     |
| Biological agent, %                          | 36.36                     |
| Treatment naïve, %                           | 22.73                     |

606 **FIGURE LEGENDS**

607 **FIG 1 Altered bacterial microbiota biodiversity and composition in AS.** (A,B and  
608 C) Observed species, Shannon, Simpson index describing the alpha diversity of the  
609 bacterial microbiota in two groups. (D) Beta diversity. (E) NMDS analysis (F and G)  
610 Global composition of bacterial microbiota at the phyla and genus levels. (H) Taxa  
611 differentiating AS from HC.

612 **FIG 2 Altered bacterial microbiota biodiversity and composition in AS patients**  
613 **receiving different therapeutic regimens.** (A) Observed species, Shannon index and  
614 Simpson index describing the alpha diversity of the bacterial microbiota in the  
615 different groups. (B) Beta diversity. Principal coordinate analysis (PCoA) of  
616 Bray–Curtis distance with each group coloured according to the different treatment  
617 methods. PC1 and PC2 represent the top two principal coordinates that captured most  
618 of the diversity. The fraction of diversity captured by the coordinate is given as a  
619 percentage. Groups were compared using Permanova method. (C and D) Global  
620 composition of bacterial microbiota at the phylum and genus levels. (E) Taxa  
621 differentiating AS-BL group from AS-TN group.

622 **FIG 3 Altered fungal microbiota biodiversity and composition in AS.** (A)The  
623 Venn diagram depicts OTUs that were unique to HC, unique to AS or shared. (B)  
624 Observed species, Shannon, Simpson index describing the alpha diversity of the  
625 fungal microbiota in two groups. (C) ITS2/16S observed species ratio. (D) Beta  
626 diversity. PCoA of Bray–Curtis distance with each sample coloured according to the  
627 two groups. PC1 and PC2 represent the top two principal coordinates that captured

628 most of the diversity. The fraction of diversity captured by the coordinate is given as a  
629 percentage. Groups were compared using Permanova method. (E and F) Global  
630 composition of fungal microbiota at the phyla and genus levels. (G) Taxa  
631 differentiating AS from HC samples.

632 **FIG 4 Altered mycobiota and bacteria - fungi correlation in AS patients**  
633 **receiving different therapeutic regimens.** (A) Observed species, Shannon index,  
634 Simpson index describing the alpha diversity of the fungal microbiota in four groups  
635 studied. (B) ITS2/16S observed species ratio. (C) Beta diversity. PCoA of Bray-Curtis  
636 distance with each sample coloured according to the four groups. PC1 and PC2  
637 represent the top two principal coordinates that captured most of the diversity. The  
638 fraction of diversity captured by the coordinate is given as a percentage. Groups were  
639 compared using Permanova method. (D) The main composition of fungal microbiota  
640 in four groups studied. (E) Specific bacteria-fungi correlation pattern in AS. Distance  
641 correlation plots of the relative abundance of fungi and bacteria genera. Statistical  
642 significance was determined for all pairwise comparisons; only significant  
643 correlations (p value <0.05 after false discovery rate correction) are displayed.  
644 Positive values (blue squares) indicate positive correlations, and negative values (red  
645 squares) indicate inverse correlations. The shading of the square indicates the  
646 magnitude of the association; darker shades are more strongly associated than lighter  
647 shades. The sign of the correlation was determined using Spearman's method.

648 **FIG 5 Altered mycobiota in AS patients is associated with disease activities and**  
649 **levels of radiographic damage.** (A) The canonical correspondence analysis (CCA)



650 establish the relationship between the disease activity measures and the bacterial and  
651 fungal community in AS patients. The direction of arrows indicates correlation with  
652 the first two canonical axes and the length of arrows represents the strength of the  
653 correlations. (B) PCA of the gut bacterial and fungal genera of AS patients according  
654 to their stages of radiographic changes.

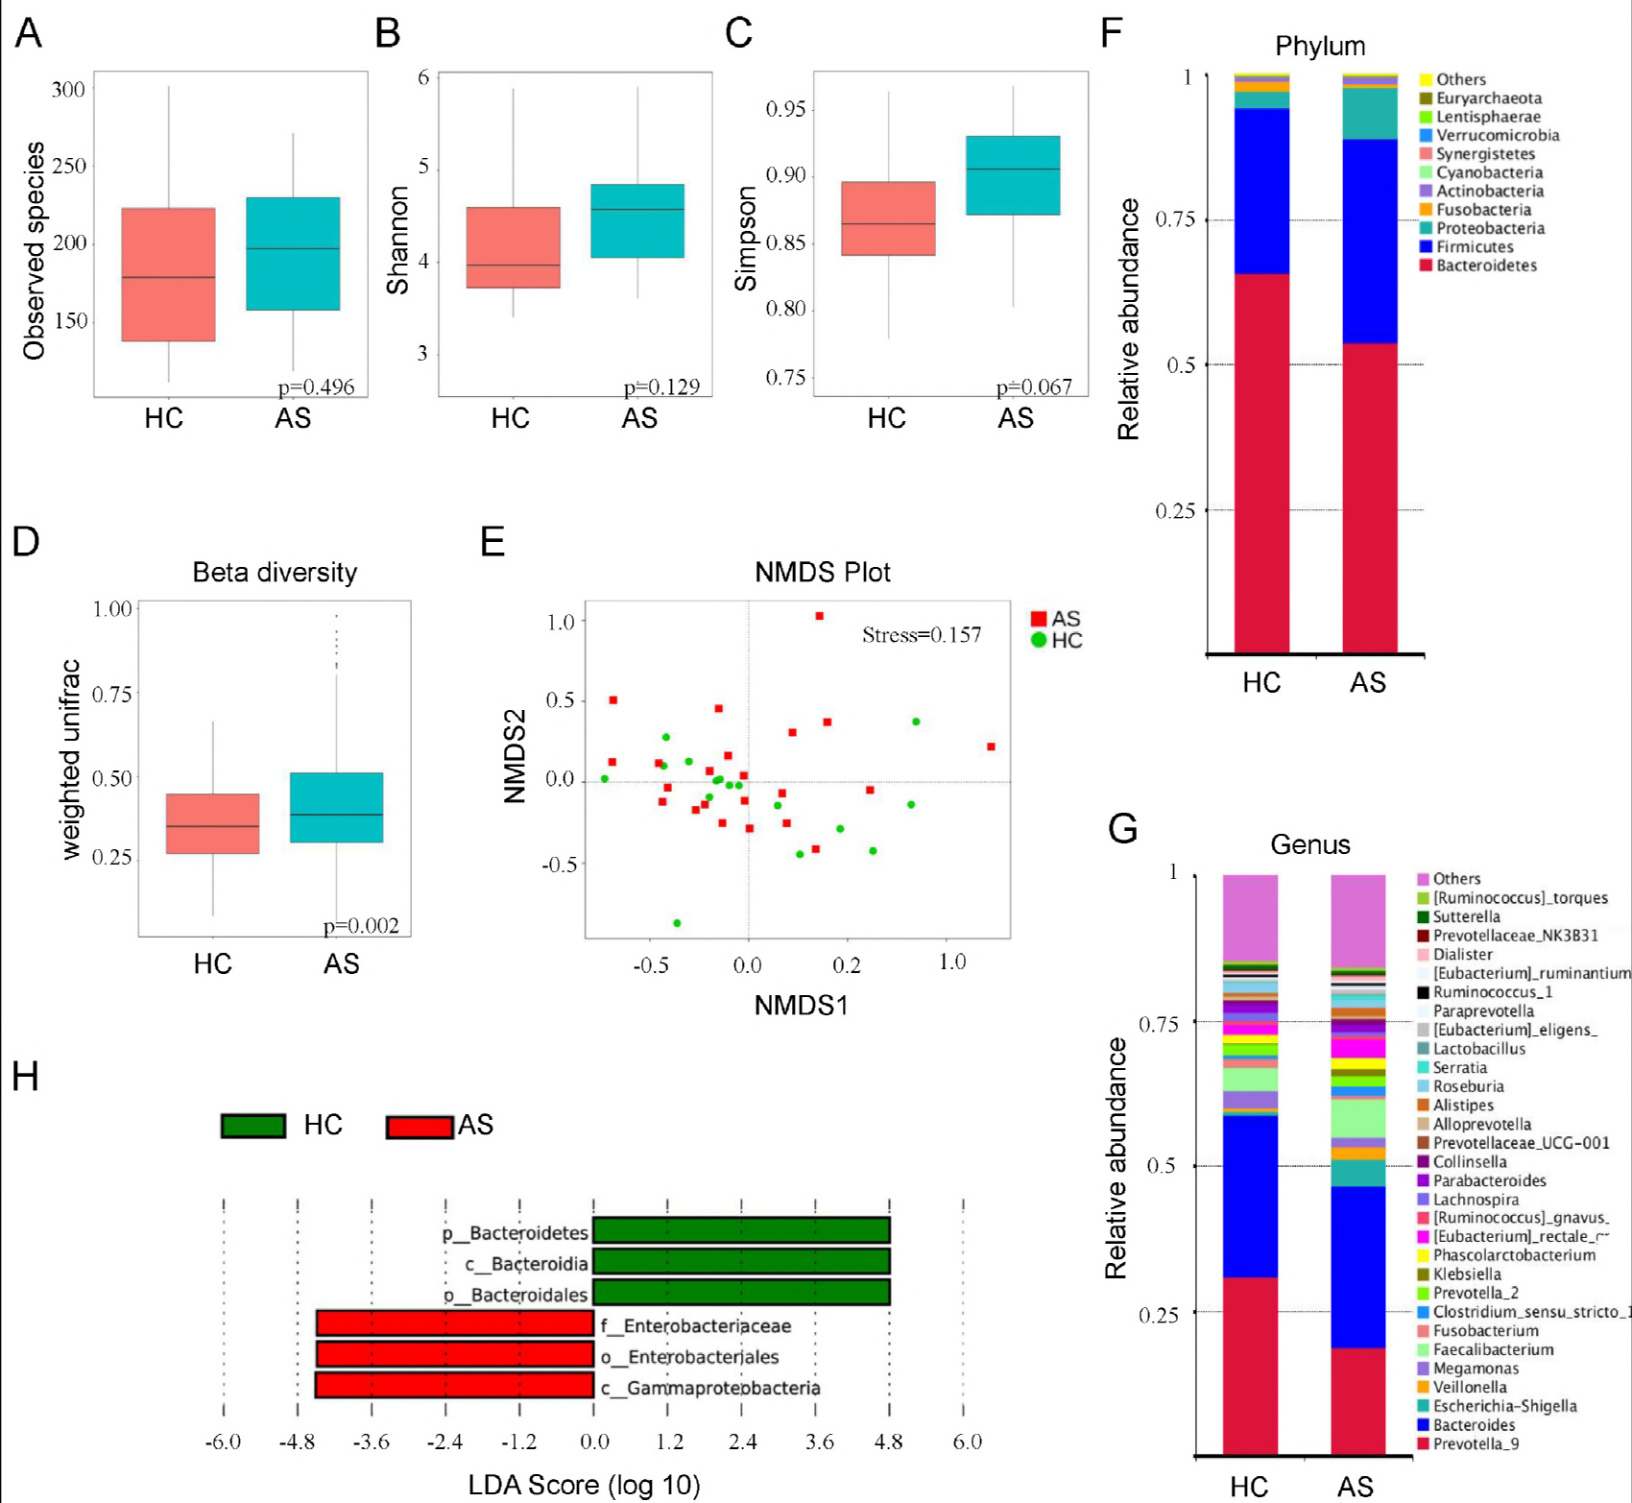

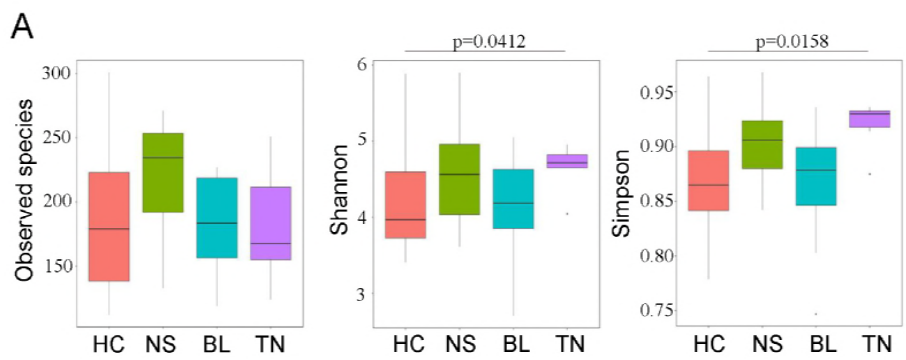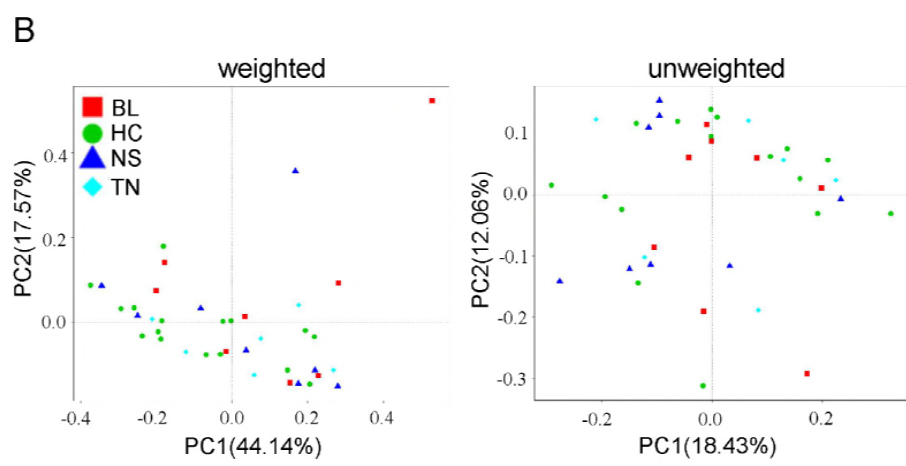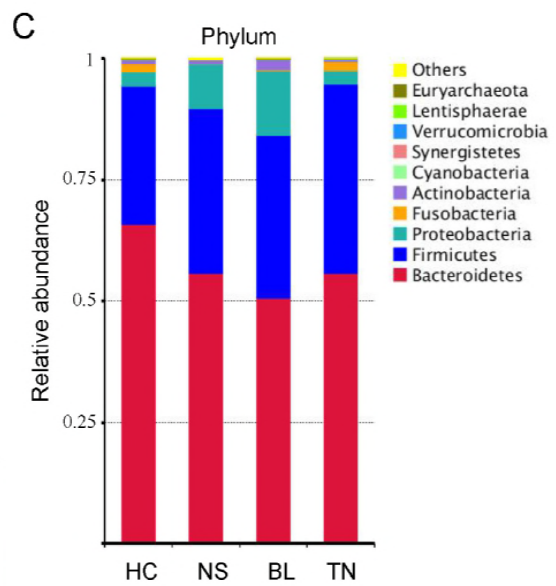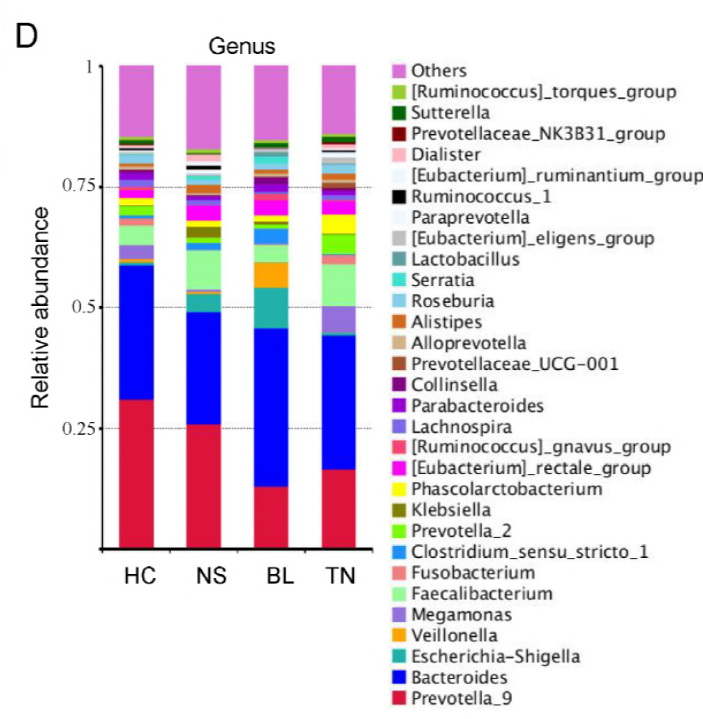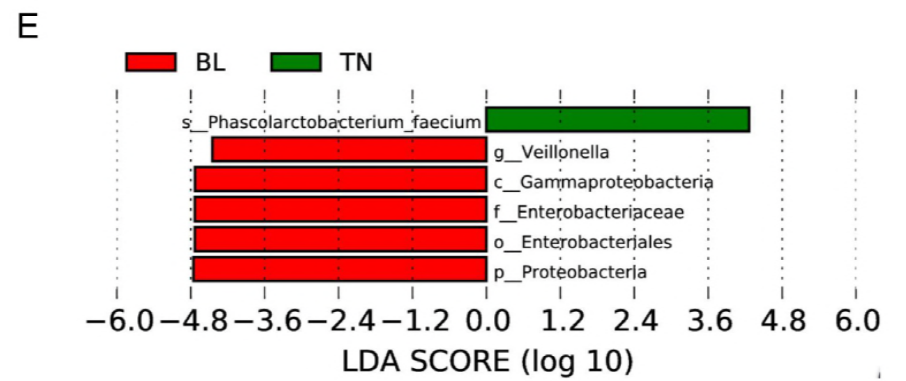

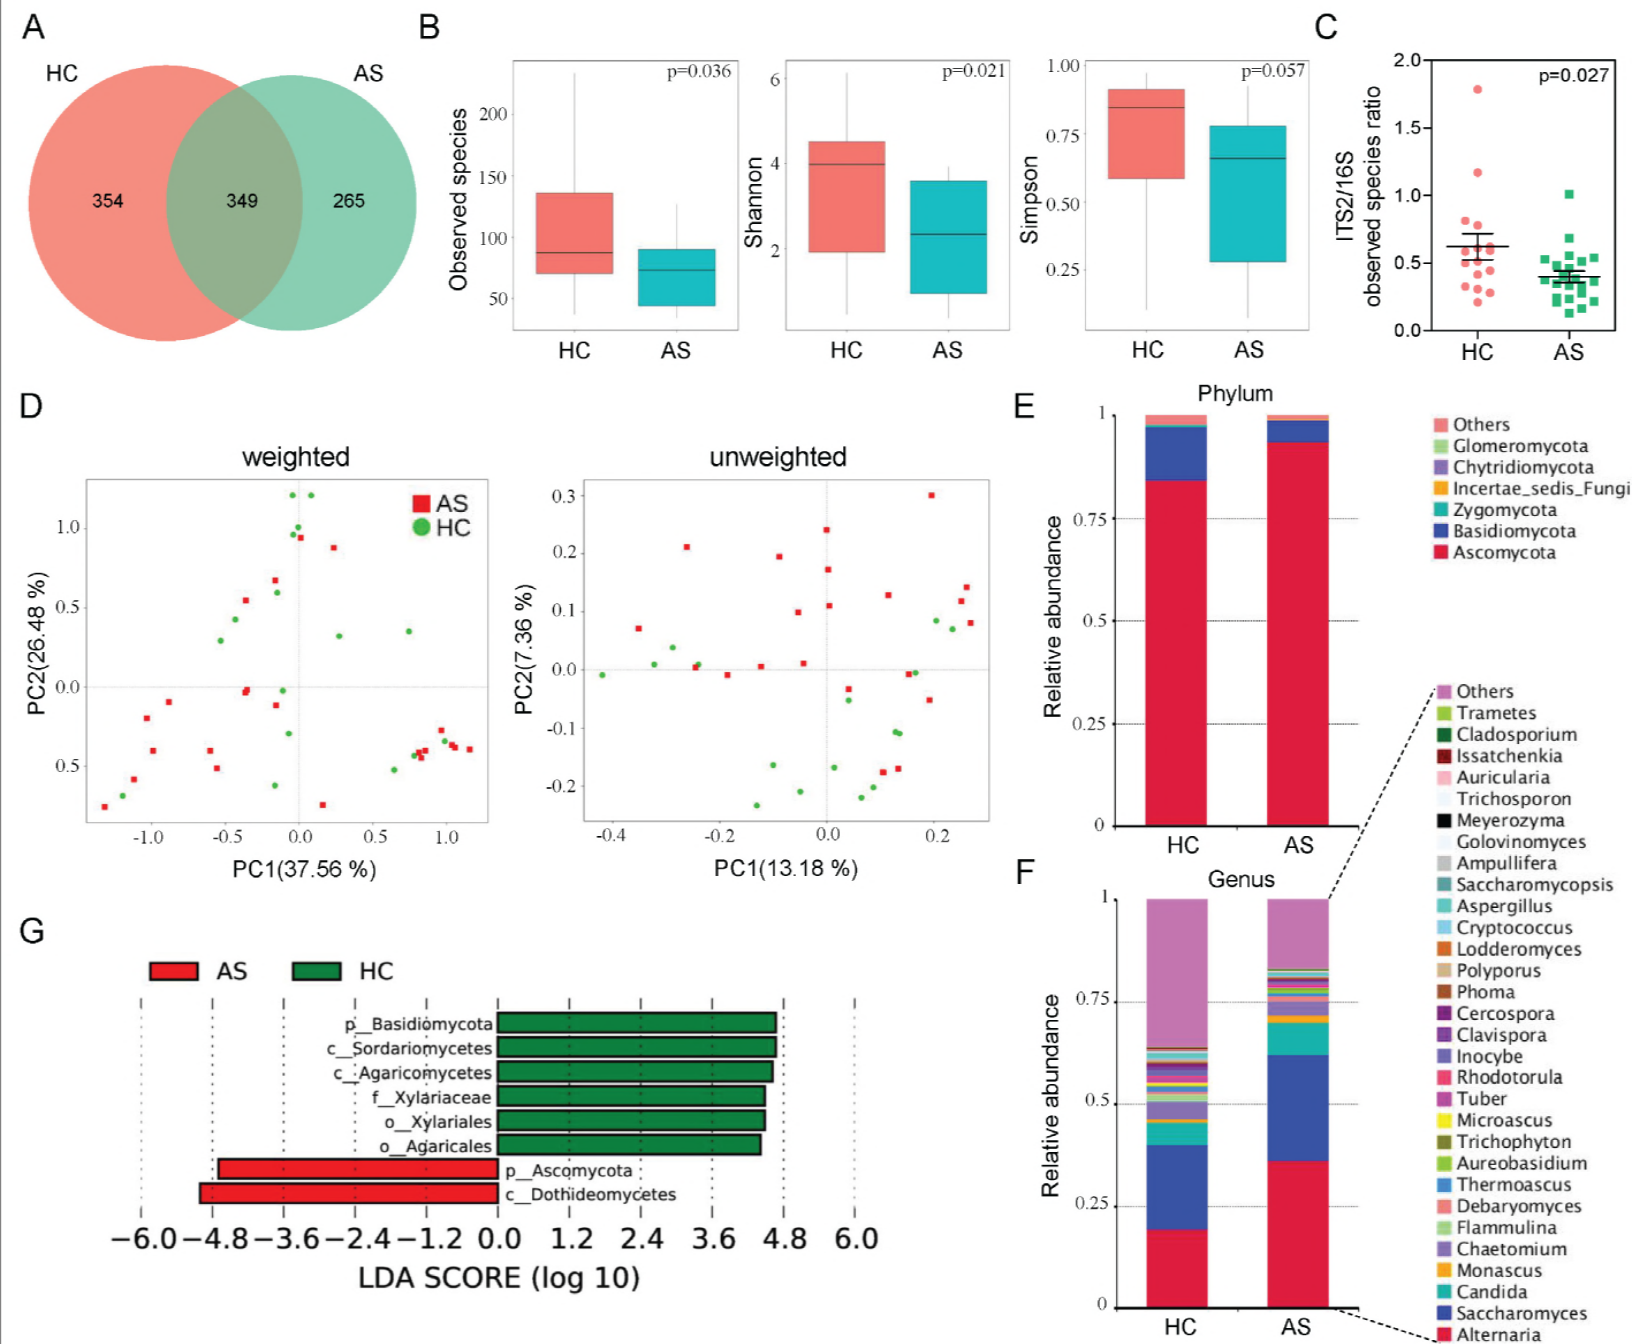

A

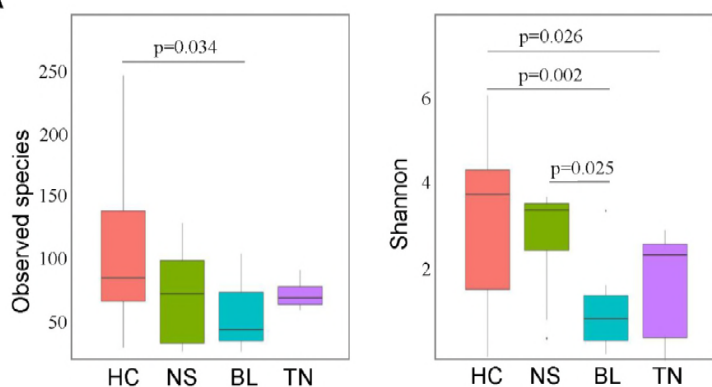

B

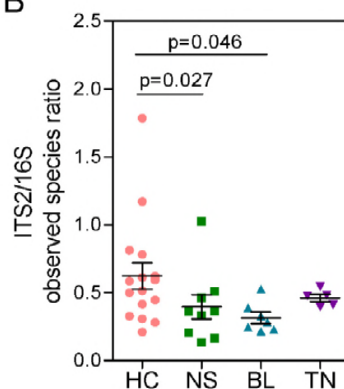

C

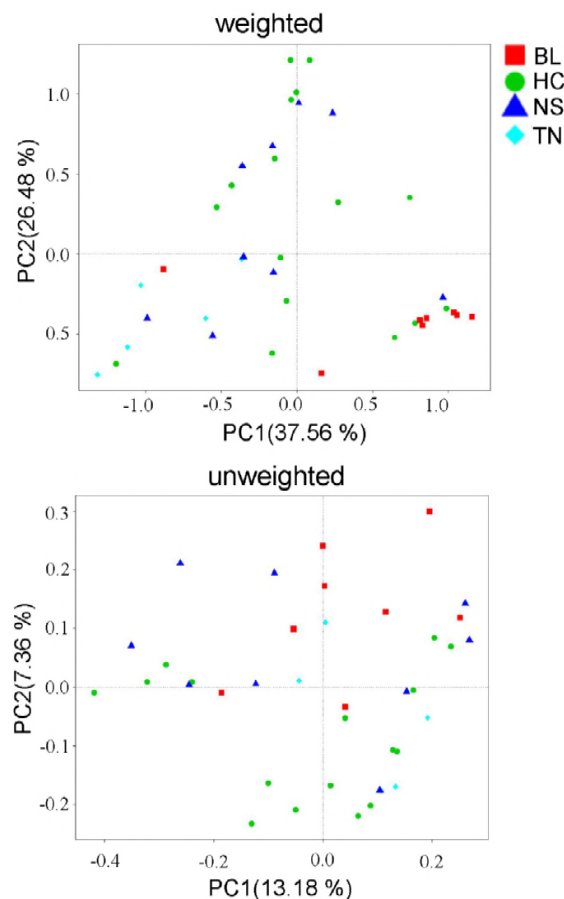

D

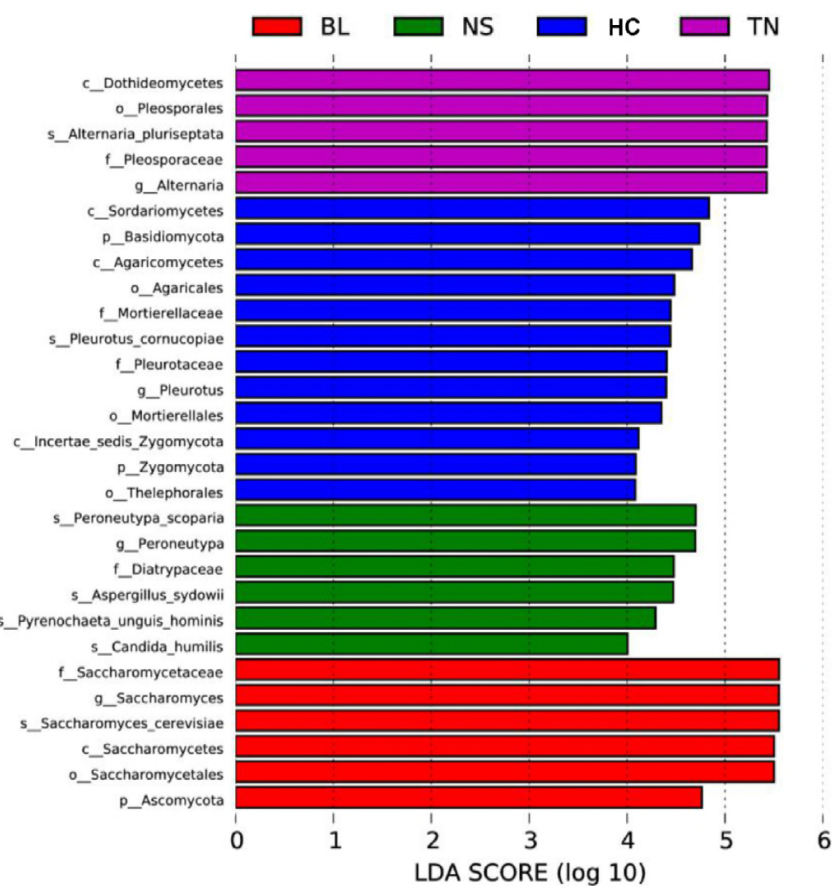

E

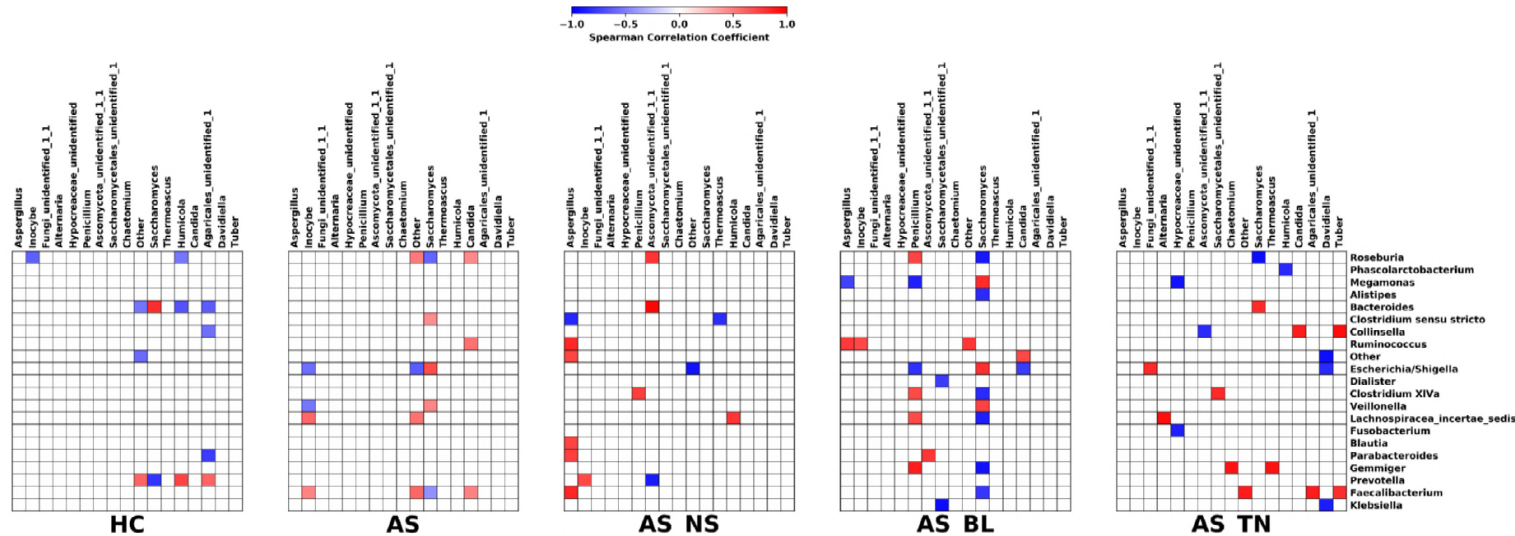

A

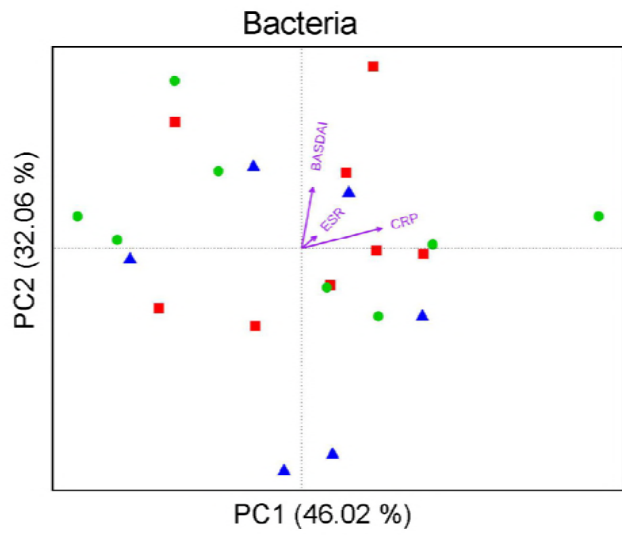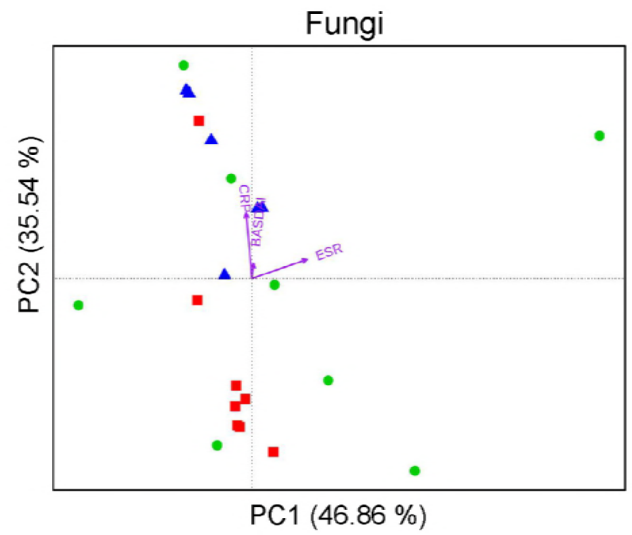

■ BL  
● NS  
▲ TN

B

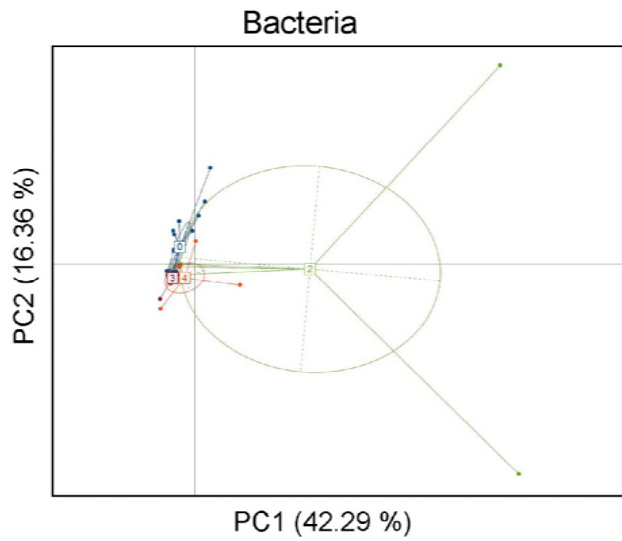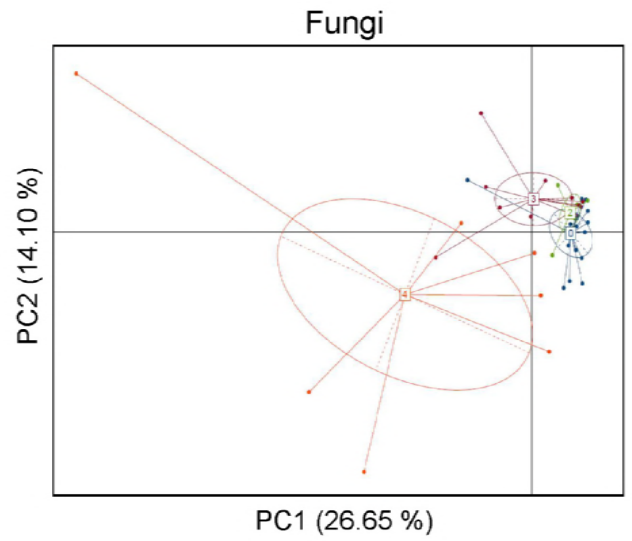

● TN (0)  
● Grade II (2)  
● Grade III (3)  
● Grade IV (4)

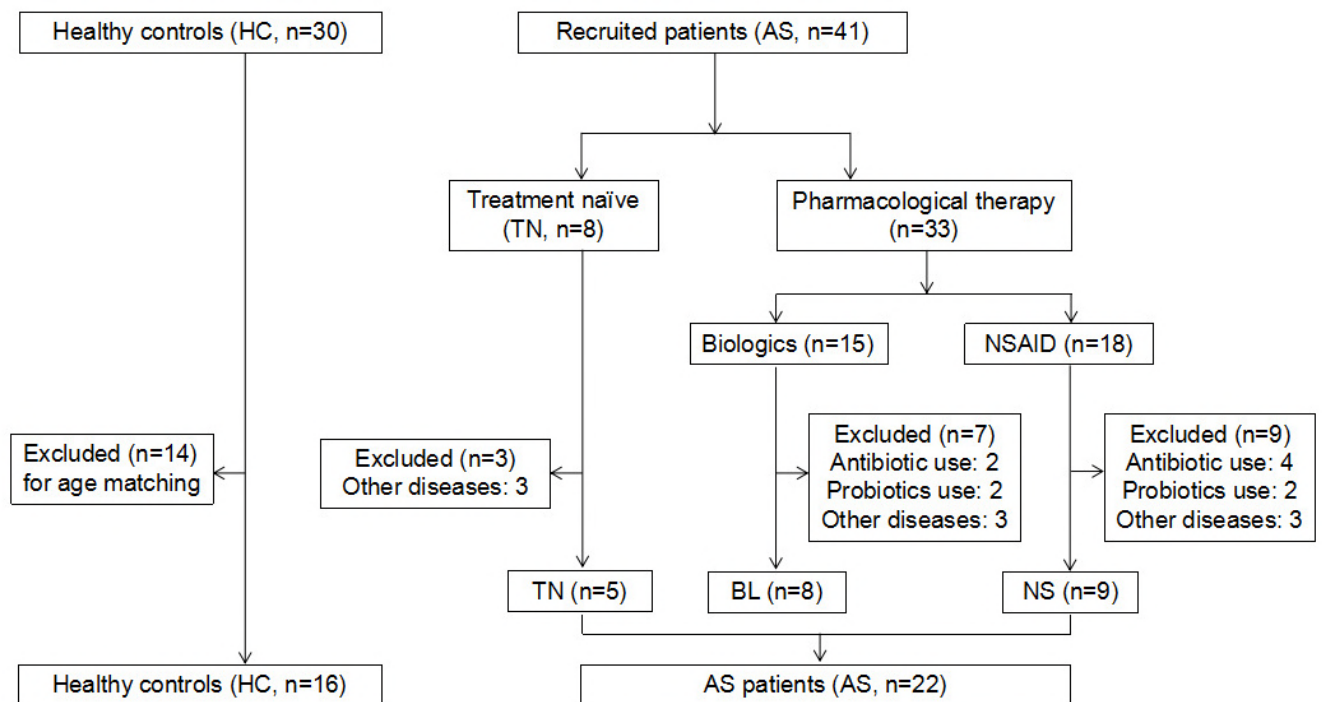

HC AS

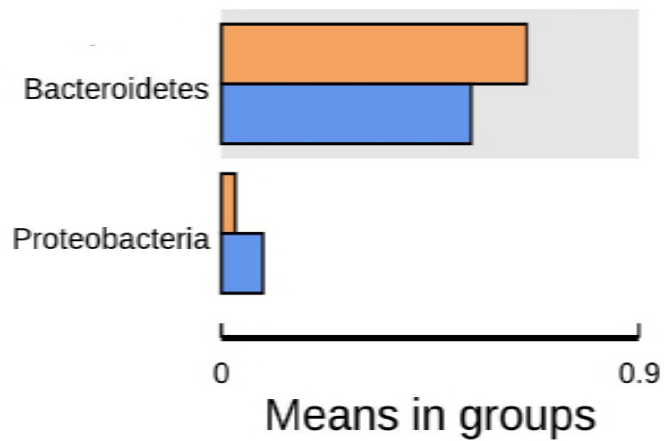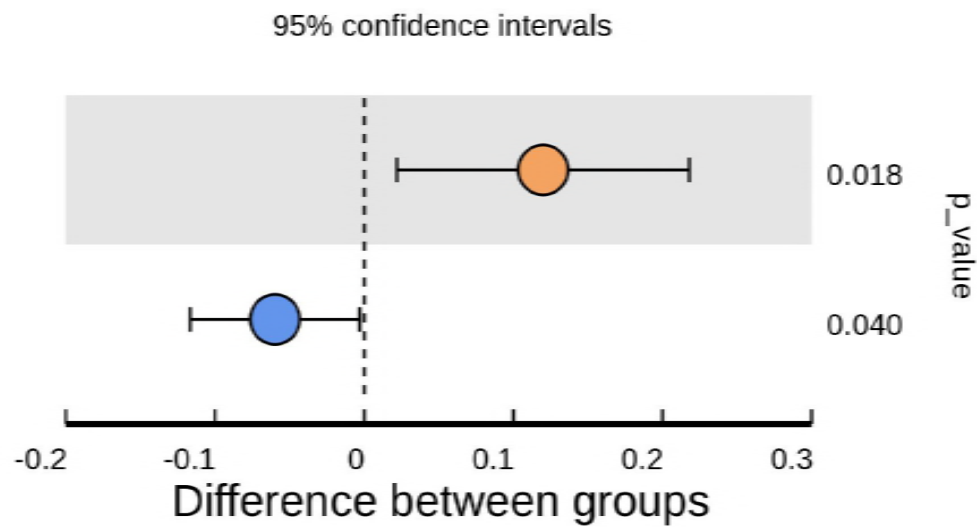



# Cladogram

AS  
HC

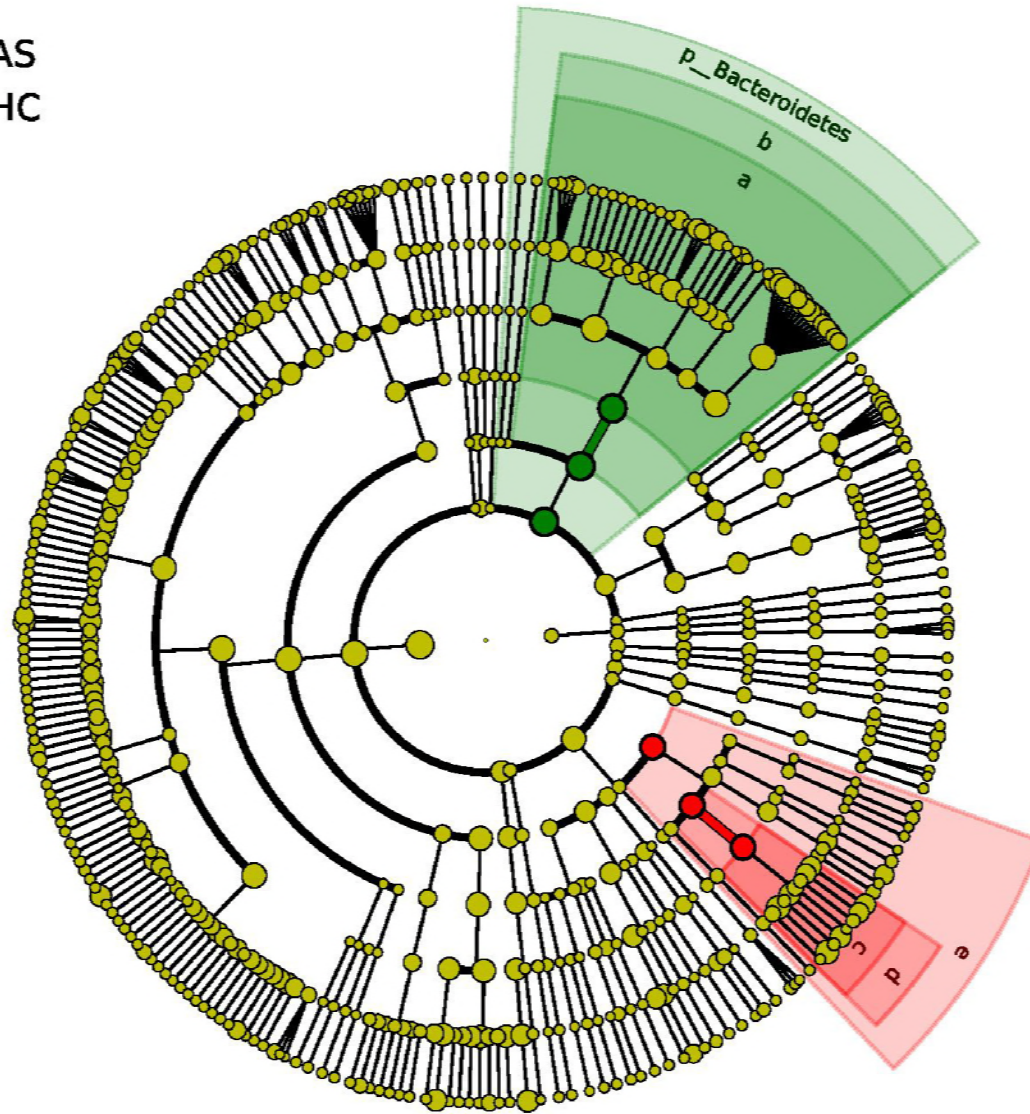

a: o\_Bacteroidales  
b: c\_Bacteroidia  
c: f\_Enterobacteriaceae  
d: o\_Enterobacteriales  
e: c\_Gammaproteobacteria

A. HC bacteria network

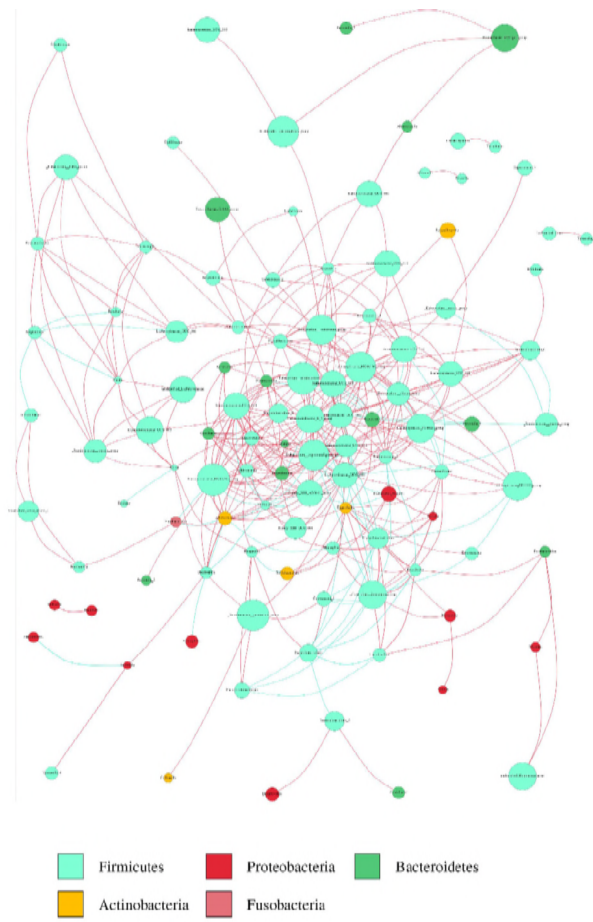

B. AS bacteria network

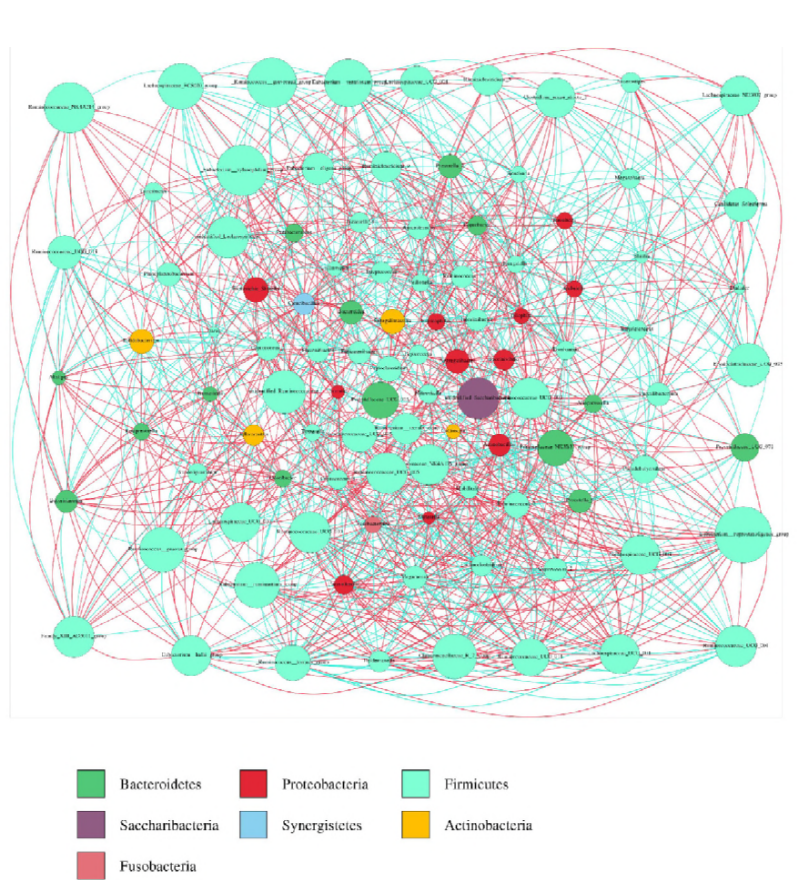

C. HC fungi network

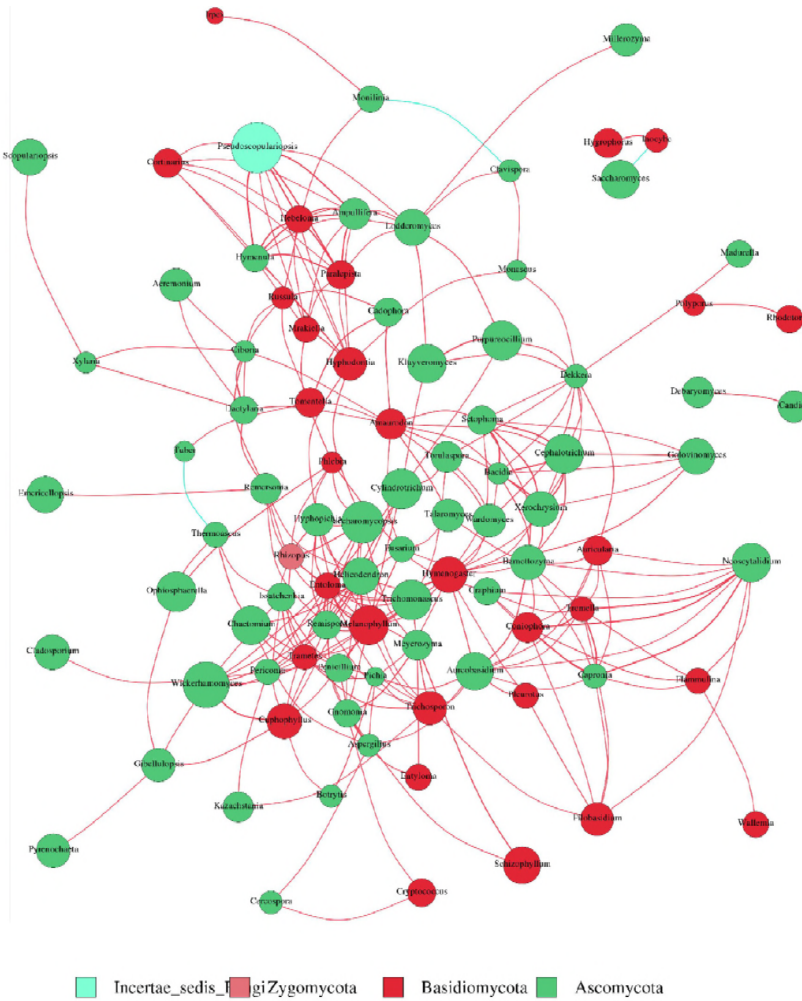

D. AS fungi network

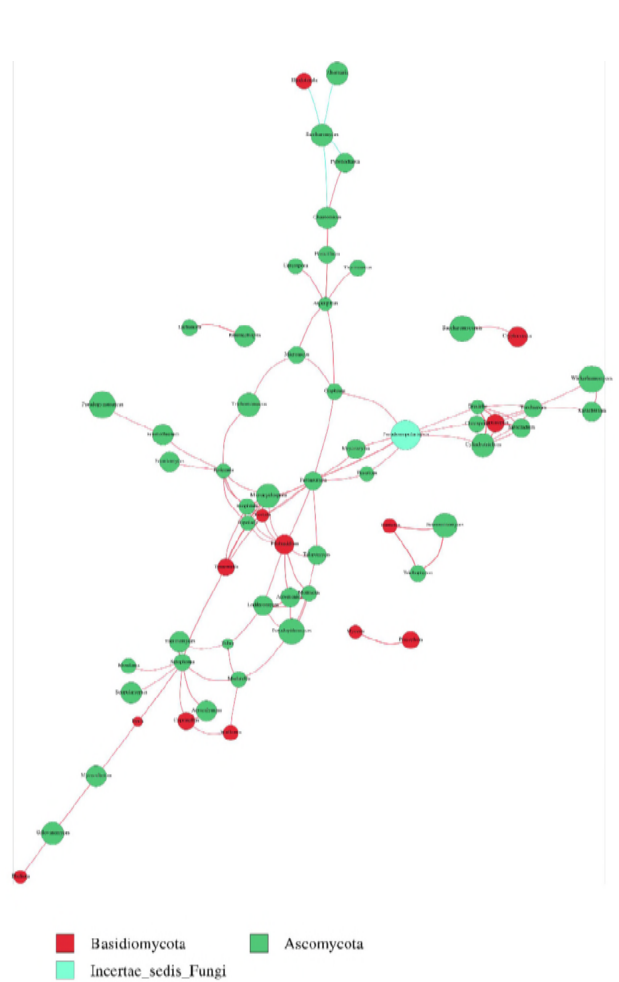

Source: https://www.biorxiv.org/content/10.1101/396812v1.full.pdf
